# Supplementary material
Source: MDPI journal article supplement (https://www.mdpi.com/2072-4292/15/13/3233)
Supplement: s1 [file s1]

**Table S1.** Detail of the S1 SAR acquisitions considered for this study. Dates are in YYYY/MM/DD format. ASC = Ascending; DESC = Descending. Bold lines correspond to pre- and post-storm images. These acquisitions can be obtained from the Alaska Satellite Facility Distributed Active Archive Center (ASF DAAC) (<https://asf.alaska.edu/>, accessed on 10 March 2023) by providing each Image ID.

| Image N°  | Image ID                                                                   | Orbit type | Date              |
|-----------|----------------------------------------------------------------------------|------------|-------------------|
| 1         | S1A_IW_SLC__1SDV_20160601T181745_20160601T181812_011521_01193D_F72A        | ASC        | 2016/06/01        |
| 2         | S1A_IW_SLC__1SDV_20160613T181746_20160613T181813_011696_011EB5_AB1A        | ASC        | 2016/06/13        |
| 3         | S1A_IW_SLC__1SDV_20160719T181748_20160719T181815_012221_012F94_8C52        | ASC        | 2016/07/19        |
| 4         | S1A_IW_SLC__1SDV_20160731T181749_20160731T181816_012396_013553_D5FC        | ASC        | 2016/07/31        |
| 5         | S1A_IW_SLC__1SDV_20160905T181751_20160905T181817_012921_0146D6_3139        | ASC        | 2016/09/05        |
| 6         | S1A_IW_SLC__1SDV_20160917T181751_20160917T181818_013096_014C7B_9ADC        | ASC        | 2016/09/17        |
| 7         | S1B_IW_SLC__1SDV_20161029T181707_20161029T181734_002725_0049CD_A96C        | ASC        | 2016/10/29        |
| 8         | S1B_IW_SLC__1SDV_20161110T181706_20161110T181733_002900_004EB0_E563        | ASC        | 2016/11/10        |
| 9         | S1B_IW_SLC__1SDV_20161216T181705_20161216T181732_003425_005D9C_A30B        | ASC        | 2016/12/16        |
| 10        | S1B_IW_SLC__1SDV_20161228T181705_20161228T181732_003600_00629E_0D85        | ASC        | 2016/12/28        |
| 11        | S1B_IW_SLC__1SDV_20170202T181703_20170202T181730_004125_00722F_D70F        | ASC        | 2017/02/02        |
| 12        | S1B_IW_SLC__1SDV_20170214T181703_20170214T181730_004300_007765_43BD        | ASC        | 2017/02/14        |
| 13        | S1A_IW_SLC__1SDV_20170304T181747_20170304T181814_015546_0198C5_495B        | ASC        | 2017/03/04        |
| 14        | S1B_IW_SLC__1SDV_20170310T181703_20170310T181730_004650_0081B9_CB97        | ASC        | 2017/03/10        |
| 15        | S1B_IW_SLC__1SDV_20170403T181703_20170403T181730_005000_008BE7_60C7        | ASC        | 2017/04/03        |
| 16        | S1A_IW_SLC__1SDV_20170409T181748_20170409T181815_016071_01A87C_613C        | ASC        | 2017/04/09        |
| 17        | S1A_IW_SLC__1SDV_20170503T181750_20170503T181817_016421_01B325_A833        | ASC        | 2017/05/03        |
| 18        | S1B_IW_SLC__1SDV_20170509T181705_20170509T181732_005525_009AE0_33B9        | ASC        | 2017/05/09        |
| 19        | S1A_IW_SLC__1SDV_20170608T181752_20170608T181819_016946_01C347_EECA        | ASC        | 2017/06/08        |
| 20        | S1B_IW_SLC__1SDV_20170614T181724_20170614T181751_006050_00A9F8_9D2E        | ASC        | 2017/06/14        |
| 21        | S1B_IW_SLC__1SDV_20170708T181725_20170708T181752_006400_00B402_635F        | ASC        | 2017/07/08        |
| 22        | S1A_IW_SLC__1SDV_20170714T181754_20170714T181821_017471_01D33D_480E        | ASC        | 2017/07/14        |
| 23        | S1A_IW_SLC__1SDV_20170807T181755_20170807T181822_017821_01DDF0_4128        | ASC        | 2017/08/07        |
| 24        | S1B_IW_SLC__1SDV_20170813T181727_20170813T181754_006925_00C321_9C8C        | ASC        | 2017/08/13        |
| 25        | S1B_IW_SLC__1SDV_20170906T181728_20170906T181755_007275_00CD47_A91F        | ASC        | 2017/09/06        |
| 26        | S1A_IW_SLC__1SDV_20170912T181757_20170912T181823_018346_01EDFD_06A2        | ASC        | 2017/09/12        |
| 27        | S1A_IW_SLC__1SDV_20171006T181757_20171006T181824_018696_01F8AD_E509        | ASC        | 2017/10/06        |
| 28        | S1B_IW_SLC__1SDV_20171012T181729_20171012T181756_007800_00DC6C_FB8F        | ASC        | 2017/10/12        |
| 29        | S1B_IW_SLC__1SDV_20171105T181729_20171105T181756_008150_00E675_7378        | ASC        | 2017/11/05        |
| 30        | S1A_IW_SLC__1SDV_20171111T181757_20171111T181824_019221_0208BF_3CDE        | ASC        | 2017/11/11        |
| 31        | S1A_IW_SLC__1SDV_20171205T181756_20171205T181823_019571_0213C4_D561        | ASC        | 2017/12/05        |
| 32        | S1B_IW_SLC__1SDV_20171211T181728_20171211T181755_008675_00F6B5_E0F3        | ASC        | 2017/12/11        |
| 33        | S1B_IW_SLC__1SDV_20180104T181727_20180104T181754_009025_0101F6_17FE        | ASC        | 2018/01/04        |
| 34        | S1A_IW_SLC__1SDV_20180110T181755_20180110T181822_020096_022426_CFE2        | ASC        | 2018/01/10        |
| 35        | S1A_IW_SLC__1SDV_20180203T181754_20180203T181821_020446_022F4B_3681        | ASC        | 2018/02/03        |
| 36        | S1B_IW_SLC__1SDV_20180209T181726_20180209T181753_009550_011324_1113        | ASC        | 2018/02/09        |
| 37        | S1B_IW_SLC__1SDV_20180221T181726_20180221T181753_009725_0118E2_F941        | ASC        | 2018/02/21        |
| <b>38</b> | <b>S1A_IW_SLC__1SDV_20180227T181754_20180227T181821_020796_023A79_B45C</b> | <b>ASC</b> | <b>2018/02/27</b> |
| <b>39</b> | <b>S1B_IW_SLC__1SDV_20180305T181726_20180305T181753_009900_011EBA_CF74</b> | <b>ASC</b> | <b>2018/03/05</b> |
| 40        | S1A_IW_SLC__1SDV_20160701T062712_20160701T062740_011951_0126C6_7E5C        | DESC       | 2016/07/01        |
| 41        | S1A_IW_SLC__1SDV_20160713T062713_20160713T062741_012126_012C80_2D7F        | DESC       | 2016/07/13        |
| 42        | S1A_IW_SLC__1SDV_20160725T062705_20160725T062732_012301_013237_231B        | DESC       | 2016/07/25        |
| 43        | S1A_IW_SLC__1SDV_20160806T062722_20160806T062749_012476_013809_AED1        | DESC       | 2016/08/06        |

|    |                                                                     |      |            |
|----|---------------------------------------------------------------------|------|------------|
| 44 | S1A_IW_SLC__1SDV_20160911T062716_20160911T062744_013001_014959_DE60 | DESC | 2016/09/11 |
| 45 | S1A_IW_SLC__1SDV_20160923T062716_20160923T062744_013176_014F27_4818 | DESC | 2016/09/23 |
| 46 | S1A_IW_SLC__1SDV_20161029T062717_20161029T062745_013701_015FA7_B009 | DESC | 2016/10/29 |
| 47 | S1A_IW_SLC__1SDV_20161110T062716_20161110T062744_013876_016529_3EC9 | DESC | 2016/11/10 |
| 48 | S1A_IW_SLC__1SDV_20161216T062715_20161216T062743_014401_017581_5C97 | DESC | 2016/12/16 |
| 49 | S1A_IW_SLC__1SDV_20161228T062715_20161228T062743_014576_017AEF_C40B | DESC | 2016/12/28 |
| 50 | S1A_IW_SLC__1SDV_20170202T062713_20170202T062741_015101_018B01_16C9 | DESC | 2017/02/02 |
| 51 | S1A_IW_SLC__1SDV_20170214T062713_20170214T062741_015276_019087_5C7F | DESC | 2017/02/14 |
| 52 | S1B_IW_SLC__1SDV_20170304T062620_20170304T062647_004555_007EFE_5245 | DESC | 2017/03/04 |
| 53 | S1A_IW_SLC__1SDV_20170310T062713_20170310T062741_015626_019B2A_C5A6 | DESC | 2017/03/10 |
| 54 | S1A_IW_SLC__1SDV_20170403T062713_20170403T062741_015976_01A590_78B7 | DESC | 2017/04/03 |
| 55 | S1B_IW_SLC__1SDV_20170409T062621_20170409T062648_005080_008E34_11DA | DESC | 2017/04/09 |
| 56 | S1B_IW_SLC__1SDV_20170503T062623_20170503T062650_005430_00984F_C1AA | DESC | 2017/05/03 |
| 57 | S1A_IW_SLC__1SDV_20170509T062715_20170509T062743_016501_01B593_0011 | DESC | 2017/05/09 |
| 58 | S1B_IW_SLC__1SDV_20170608T062628_20170608T062655_005955_00A72C_E5CC | DESC | 2017/06/08 |
| 59 | S1A_IW_SLC__1SDV_20170614T062724_20170614T062751_017026_01C5BA_87F4 | DESC | 2017/06/14 |
| 60 | S1A_IW_SLC__1SDV_20170708T062726_20170708T062753_017376_01D051_A245 | DESC | 2017/07/08 |
| 61 | S1B_IW_SLC__1SDV_20170714T062630_20170714T062657_006480_00B64D_F498 | DESC | 2017/07/14 |
| 62 | S1B_IW_SLC__1SDV_20170807T062632_20170807T062659_006830_00C058_3D6F | DESC | 2017/08/07 |
| 63 | S1A_IW_SLC__1SDV_20170813T062728_20170813T062755_017901_01E050_DAEC | DESC | 2017/08/13 |
| 64 | S1A_IW_SLC__1SDV_20170906T062729_20170906T062756_018251_01EAF2_C3EA | DESC | 2017/09/06 |
| 65 | S1B_IW_SLC__1SDV_20170912T062633_20170912T062700_007355_00CFA5_8AFE | DESC | 2017/09/12 |
| 66 | S1B_IW_SLC__1SDV_20171006T062634_20171006T062701_007705_00D9BA_2B3A | DESC | 2017/10/06 |
| 67 | S1A_IW_SLC__1SDV_20171012T062730_20171012T062757_018776_01FB0E_4673 | DESC | 2017/10/12 |
| 68 | S1A_IW_SLC__1SDV_20171105T062730_20171105T062757_019126_0205C6_1461 | DESC | 2017/11/05 |
| 69 | S1B_IW_SLC__1SDV_20171111T062634_20171111T062701_008230_00E8DE_8EB7 | DESC | 2017/11/11 |
| 70 | S1B_IW_SLC__1SDV_20171205T062633_20171205T062700_008580_00F3B3_9C85 | DESC | 2017/12/05 |
| 71 | S1A_IW_SLC__1SDV_20171211T062729_20171211T062756_019651_021639_9A72 | DESC | 2017/12/11 |
| 72 | S1A_IW_SLC__1SDV_20180104T062728_20180104T062755_020001_02211F_F150 | DESC | 2018/01/04 |
| 73 | S1B_IW_SLC__1SDV_20180110T062632_20180110T062659_009105_010494_84EC | DESC | 2018/01/10 |
| 74 | S1B_IW_SLC__1SDV_20180203T062631_20180203T062658_009455_011005_B33D | DESC | 2018/02/03 |
| 75 | S1A_IW_SLC__1SDV_20180209T062727_20180209T062754_020526_0231D3_7E0F | DESC | 2018/02/09 |
| 76 | S1A_IW_SLC__1SDV_20180221T062727_20180221T062754_020701_023765_66A2 | DESC | 2018/02/21 |
| 77 | S1B_IW_SLC__1SDV_20180227T062631_20180227T062658_009805_011B96_E1D2 | DESC | 2018/02/27 |
| 78 | S1A_IW_SLC__1SDV_20180305T062727_20180305T062754_020876_023CEE_1A89 | DESC | 2018/03/05 |
