# Supplementary material
Source: MDPI journal article supplement (https://www.mdpi.com/2072-4292/15/13/3233)
Supplement: s1 [file s1]

# Land Use/Land Cover Optimized SAR Coherence Analysis for Rapid Coastal Disaster Monitoring: The Impact of the Emma Storm in Southern Spain

Pedro Andrés Garzo <sup>1,\*</sup> and Tomás Fernández-Montblanc <sup>2</sup>

<sup>1</sup> Instituto de Geología de Costas y del Cuaternario (IGCC – UNMDP/CIC), Instituto de Investigaciones Marinas y Costeras (IIMyC – CONICET/UNMDP), University of Mar del Plata, Funes 3350 (7600), Mar del Plata, Buenos Aires, Argentina;

<sup>2</sup> Earth Sciences Department, University of Cádiz, INMAR, Av. República Saharaui s/n (11510), Puerto Real, 11003 Cádiz, Spain; tomas.fernandez@uca.es

\* Correspondence: pgarzo@agro.uba.ar

## Supplementary Materials

**Table S1.** Detail of the S1 SAR acquisitions considered for this study. Dates are in YYYY/MM/DD format. ASC = Ascending; DESC = Descending. Bold lines correspond to pre- and post-storm images. These acquisitions can be obtained from the Alaska Satellite Facility Distributed Active Archive Center (ASF DAAC) (<https://asf.alaska.edu/>, accessed on 10 March 2023) by providing each Image ID.

| Image N° | Image ID                                                           | Orbit type | Date       |
|----------|--------------------------------------------------------------------|------------|------------|
| 1        | S1A_IW_SLC_1SDV_20160601T181745_20160601T181812_011521_01193D_F72A | ASC        | 2016/06/01 |
| 2        | S1A_IW_SLC_1SDV_20160613T181746_20160613T181813_011696_011EB5_AB1A | ASC        | 2016/06/13 |
| 3        | S1A_IW_SLC_1SDV_20160719T181748_20160719T181815_012221_012F94_8C52 | ASC        | 2016/07/19 |
| 4        | S1A_IW_SLC_1SDV_20160731T181749_20160731T181816_012396_013553_D5FC | ASC        | 2016/07/31 |
| 5        | S1A_IW_SLC_1SDV_20160905T181751_20160905T181817_012921_0146D6_3139 | ASC        | 2016/09/05 |
| 6        | S1A_IW_SLC_1SDV_20160917T181751_20160917T181818_013096_014C7B_9ADC | ASC        | 2016/09/17 |
| 7        | S1B_IW_SLC_1SDV_20161029T181707_20161029T181734_002725_0049CD_A96C | ASC        | 2016/10/29 |
| 8        | S1B_IW_SLC_1SDV_20161110T181706_20161110T181733_002900_004EB0_E563 | ASC        | 2016/11/10 |
| 9        | S1B_IW_SLC_1SDV_20161216T181705_20161216T181732_003425_005D9C_A30B | ASC        | 2016/12/16 |
| 10       | S1B_IW_SLC_1SDV_20161228T181705_20161228T181732_003600_00629E_0D85 | ASC        | 2016/12/28 |
| 11       | S1B_IW_SLC_1SDV_20170202T181703_20170202T181730_004125_00722F_D70F | ASC        | 2017/02/02 |
| 12       | S1B_IW_SLC_1SDV_20170214T181703_20170214T181730_004300_007765_43BD | ASC        | 2017/02/14 |
| 13       | S1A_IW_SLC_1SDV_20170304T181747_20170304T181814_015546_0198C5_495B | ASC        | 2017/03/04 |
| 14       | S1B_IW_SLC_1SDV_20170310T181703_20170310T181730_004650_0081B9_CB97 | ASC        | 2017/03/10 |
| 15       | S1B_IW_SLC_1SDV_20170403T181703_20170403T181730_005000_008BE7_60C7 | ASC        | 2017/04/03 |
| 16       | S1A_IW_SLC_1SDV_20170409T181748_20170409T181815_016071_01A87C_613C | ASC        | 2017/04/09 |
| 17       | S1A_IW_SLC_1SDV_20170503T181750_20170503T181817_016421_01B325_A833 | ASC        | 2017/05/03 |
| 18       | S1B_IW_SLC_1SDV_20170509T181705_20170509T181732_005525_009AE0_33B9 | ASC        | 2017/05/09 |
| 19       | S1A_IW_SLC_1SDV_20170608T181752_20170608T181819_016946_01C347_EECA | ASC        | 2017/06/08 |
| 20       | S1B_IW_SLC_1SDV_20170614T181724_20170614T181751_006050_00A9F8_9D2E | ASC        | 2017/06/14 |
| 21       | S1B_IW_SLC_1SDV_20170708T181725_20170708T181752_006400_00B402_635F | ASC        | 2017/07/08 |
| 22       | S1A_IW_SLC_1SDV_20170714T181754_20170714T181821_017471_01D33D_480E | ASC        | 2017/07/14 |
| 23       | S1A_IW_SLC_1SDV_20170807T181755_20170807T181822_017821_01DDF0_4128 | ASC        | 2017/08/07 |
| 24       | S1B_IW_SLC_1SDV_20170813T181727_20170813T181754_006925_00C321_9C8C | ASC        | 2017/08/13 |
| 25       | S1B_IW_SLC_1SDV_20170906T181728_20170906T181755_007275_00CD47_A91F | ASC        | 2017/09/06 |

|    |                                                                            |             |                   |
|----|----------------------------------------------------------------------------|-------------|-------------------|
| 26 | S1A_IW_SLC__1SDV_20170912T181757_20170912T181823_018346_01EDFD_06A2        | ASC         | 2017/09/12        |
| 27 | S1A_IW_SLC__1SDV_20171006T181757_20171006T181824_018696_01F8AD_E509        | ASC         | 2017/10/06        |
| 28 | S1B_IW_SLC__1SDV_20171012T181729_20171012T181756_007800_00DC6C_FB8F        | ASC         | 2017/10/12        |
| 29 | S1B_IW_SLC__1SDV_20171105T181729_20171105T181756_008150_00E675_7378        | ASC         | 2017/11/05        |
| 30 | S1A_IW_SLC__1SDV_20171111T181757_20171111T181824_019221_0208BF_3CDE        | ASC         | 2017/11/11        |
| 31 | S1A_IW_SLC__1SDV_20171205T181756_20171205T181823_019571_0213C4_D561        | ASC         | 2017/12/05        |
| 32 | S1B_IW_SLC__1SDV_20171211T181728_20171211T181755_008675_00F6B5_E0F3        | ASC         | 2017/12/11        |
| 33 | S1B_IW_SLC__1SDV_20180104T181727_20180104T181754_009025_0101F6_17FE        | ASC         | 2018/01/04        |
| 34 | S1A_IW_SLC__1SDV_20180110T181755_20180110T181822_020096_022426_CFE2        | ASC         | 2018/01/10        |
| 35 | S1A_IW_SLC__1SDV_20180203T181754_20180203T181821_020446_022F4B_3681        | ASC         | 2018/02/03        |
| 36 | S1B_IW_SLC__1SDV_20180209T181726_20180209T181753_009550_011324_1113        | ASC         | 2018/02/09        |
| 37 | S1B_IW_SLC__1SDV_20180221T181726_20180221T181753_009725_0118E2_F941        | ASC         | 2018/02/21        |
| 38 | <b>S1A_IW_SLC__1SDV_20180227T181754_20180227T181821_020796_023A79_B45C</b> | <b>ASC</b>  | <b>2018/02/27</b> |
| 39 | <b>S1B_IW_SLC__1SDV_20180305T181726_20180305T181753_009900_011EBA_CF74</b> | <b>ASC</b>  | <b>2018/03/05</b> |
| 40 | S1A_IW_SLC__1SDV_20160701T062712_20160701T062740_011951_0126C6_7E5C        | DESC        | 2016/07/01        |
| 41 | S1A_IW_SLC__1SDV_20160713T062713_20160713T062741_012126_012C80_2D7F        | DESC        | 2016/07/13        |
| 42 | S1A_IW_SLC__1SDV_20160725T062705_20160725T062732_012301_013237_231B        | DESC        | 2016/07/25        |
| 43 | S1A_IW_SLC__1SDV_20160806T062722_20160806T062749_012476_013809_AED1        | DESC        | 2016/08/06        |
| 44 | S1A_IW_SLC__1SDV_20160911T062716_20160911T062744_013001_014959_DE60        | DESC        | 2016/09/11        |
| 45 | S1A_IW_SLC__1SDV_20160923T062716_20160923T062744_013176_014F27_4818        | DESC        | 2016/09/23        |
| 46 | S1A_IW_SLC__1SDV_20161029T062717_20161029T062745_013701_015FA7_B009        | DESC        | 2016/10/29        |
| 47 | S1A_IW_SLC__1SDV_20161110T062716_20161110T062744_013876_016529_3EC9        | DESC        | 2016/11/10        |
| 48 | S1A_IW_SLC__1SDV_20161216T062715_20161216T062743_014401_017581_5C97        | DESC        | 2016/12/16        |
| 49 | S1A_IW_SLC__1SDV_20161228T062715_20161228T062743_014576_017AEF_C40B        | DESC        | 2016/12/28        |
| 50 | S1A_IW_SLC__1SDV_20170202T062713_20170202T062741_015101_018B01_16C9        | DESC        | 2017/02/02        |
| 51 | S1A_IW_SLC__1SDV_20170214T062713_20170214T062741_015276_019087_5C7F        | DESC        | 2017/02/14        |
| 52 | S1B_IW_SLC__1SDV_20170304T062620_20170304T062647_004555_007EFE_5245        | DESC        | 2017/03/04        |
| 53 | S1A_IW_SLC__1SDV_20170310T062713_20170310T062741_015626_019B2A_C5A6        | DESC        | 2017/03/10        |
| 54 | S1A_IW_SLC__1SDV_20170403T062713_20170403T062741_015976_01A590_78B7        | DESC        | 2017/04/03        |
| 55 | S1B_IW_SLC__1SDV_20170409T062621_20170409T062648_005080_008E34_11DA        | DESC        | 2017/04/09        |
| 56 | S1B_IW_SLC__1SDV_20170503T062623_20170503T062650_005430_00984F_C1AA        | DESC        | 2017/05/03        |
| 57 | S1A_IW_SLC__1SDV_20170509T062715_20170509T062743_016501_01B593_0011        | DESC        | 2017/05/09        |
| 58 | S1B_IW_SLC__1SDV_20170608T062628_20170608T062655_005955_00A72C_E5CC        | DESC        | 2017/06/08        |
| 59 | S1A_IW_SLC__1SDV_20170614T062724_20170614T062751_017026_01C5BA_87F4        | DESC        | 2017/06/14        |
| 60 | S1A_IW_SLC__1SDV_20170708T062726_20170708T062753_017376_01D051_A245        | DESC        | 2017/07/08        |
| 61 | S1B_IW_SLC__1SDV_20170714T062630_20170714T062657_006480_00B64D_F498        | DESC        | 2017/07/14        |
| 62 | S1B_IW_SLC__1SDV_20170807T062632_20170807T062659_006830_00C058_3D6F        | DESC        | 2017/08/07        |
| 63 | S1A_IW_SLC__1SDV_20170813T062728_20170813T062755_017901_01E050_DAEC        | DESC        | 2017/08/13        |
| 64 | S1A_IW_SLC__1SDV_20170906T062729_20170906T062756_018251_01EAF2_C3EA        | DESC        | 2017/09/06        |
| 65 | S1B_IW_SLC__1SDV_20170912T062633_20170912T062700_007355_00CFA5_8AFE        | DESC        | 2017/09/12        |
| 66 | S1B_IW_SLC__1SDV_20171006T062634_20171006T062701_007705_00D9BA_2B3A        | DESC        | 2017/10/06        |
| 67 | S1A_IW_SLC__1SDV_20171012T062730_20171012T062757_018776_01FB0E_4673        | DESC        | 2017/10/12        |
| 68 | S1A_IW_SLC__1SDV_20171105T062730_20171105T062757_019126_0205C6_1461        | DESC        | 2017/11/05        |
| 69 | S1B_IW_SLC__1SDV_20171111T062634_20171111T062701_008230_00E8DE_8EB7        | DESC        | 2017/11/11        |
| 70 | S1B_IW_SLC__1SDV_20171205T062633_20171205T062700_008580_00F3B3_9C85        | DESC        | 2017/12/05        |
| 71 | S1A_IW_SLC__1SDV_20171211T062729_20171211T062756_019651_021639_9A72        | DESC        | 2017/12/11        |
| 72 | S1A_IW_SLC__1SDV_20180104T062728_20180104T062755_020001_02211F_F150        | DESC        | 2018/01/04        |
| 73 | S1B_IW_SLC__1SDV_20180110T062632_20180110T062659_009105_010494_84EC        | DESC        | 2018/01/10        |
| 74 | S1B_IW_SLC__1SDV_20180203T062631_20180203T062658_009455_011005_B33D        | DESC        | 2018/02/03        |
| 75 | S1A_IW_SLC__1SDV_20180209T062727_20180209T062754_020526_0231D3_7E0F        | DESC        | 2018/02/09        |
| 76 | S1A_IW_SLC__1SDV_20180221T062727_20180221T062754_020701_023765_66A2        | DESC        | 2018/02/21        |
| 77 | <b>S1B_IW_SLC__1SDV_20180227T062631_20180227T062658_009805_011B96_E1D2</b> | <b>DESC</b> | <b>2018/02/27</b> |
| 78 | <b>S1A_IW_SLC__1SDV_20180305T062727_20180305T062754_020876_023CEE_1A89</b> | <b>DESC</b> | <b>2018/03/05</b> |

18

**TableS2.** Detail of the 40 S1 SAR interferometric pairs. Dates are in YYYY/MM/DD format. Blue diamond indicates the pre-storm image pairs and orange diamond indicates the storm image pairs. For those dates with both ascending and descending orbit images, the two perpendicular baselines are presented respectively.

| Image 1                                                                                        | Image 2                                                                                        | Btemp [d] | Orbit type | B <sub>L</sub> [m] |
|------------------------------------------------------------------------------------------------|------------------------------------------------------------------------------------------------|-----------|------------|--------------------|
| 2016/06/01                                                                                     | 2016/06/13                                                                                     | 12        | ASC        | 63.22              |
| 2016/07/19                                                                                     | 2016/07/31                                                                                     | 12        | ASC        | 36.17              |
| 2016/09/05                                                                                     | 2016/09/17                                                                                     | 12        | ASC        | 81.94              |
| 2016/07/01                                                                                     | 2016/07/13                                                                                     | 12        | DESC       | 67.22              |
| 2016/07/25                                                                                     | 2016/08/06                                                                                     | 12        | DESC       | 42.08              |
| 2016/09/11                                                                                     | 2016/09/23                                                                                     | 12        | DESC       | 50.67              |
| 2016/10/29                                                                                     | 2016/11/10                                                                                     | 12        | ASC / DESC | 100.12 / 120.77    |
| 2016/12/16                                                                                     | 2016/12/28                                                                                     | 12        | ASC / DESC | 53.04 / 39.64      |
| 2017/02/02                                                                                     | 2017/02/14                                                                                     | 12        | ASC / DESC | 21.39 / 37.91      |
| 2017/03/04                                                                                     | 2017/03/10                                                                                     | 6         | ASC / DESC | 20.46 / 35.43      |
| 2017/04/03                                                                                     | 2017/04/09                                                                                     | 6         | ASC / DESC | 9.07 / 117.73      |
| 2017/05/03                                                                                     | 2017/05/09                                                                                     | 6         | ASC / DESC | 66.74 / 10.44      |
| 2017/06/08                                                                                     | 2017/06/14                                                                                     | 6         | ASC / DESC | 29.23 / 98.31      |
| 2017/07/08                                                                                     | 2017/07/14                                                                                     | 6         | ASC / DESC | 85.81 / 66.68      |
| 2017/08/07                                                                                     | 2017/08/13                                                                                     | 6         | ASC / DESC | 74.19 / 72.90      |
| 2017/09/06                                                                                     | 2017/09/12                                                                                     | 6         | ASC / DESC | 182.49 / 21.64     |
| 2017/10/06                                                                                     | 2017/10/12                                                                                     | 6         | ASC / DESC | 143.92 / 41.81     |
| 2017/11/05                                                                                     | 2017/11/11                                                                                     | 6         | ASC / DESC | 58.77 / 86.09      |
| 2017/12/05                                                                                     | 2017/12/11                                                                                     | 6         | ASC / DESC | 134.45 / 103.29    |
| 2018/01/04                                                                                     | 2018/01/10                                                                                     | 6         | ASC / DESC | 51.32 / 17.95      |
| 2018/02/03                                                                                     | 2018/02/09                                                                                     | 6         | ASC / DESC | 13.02 / 60.81      |
| 2018/02/21  | 2018/02/27  | 6         | ASC / DESC | 35.84 / 134.49     |
| 2018/02/27  | 2018/03/05  | 6         | ASC / DESC | 37.47 / 32.95      |

23

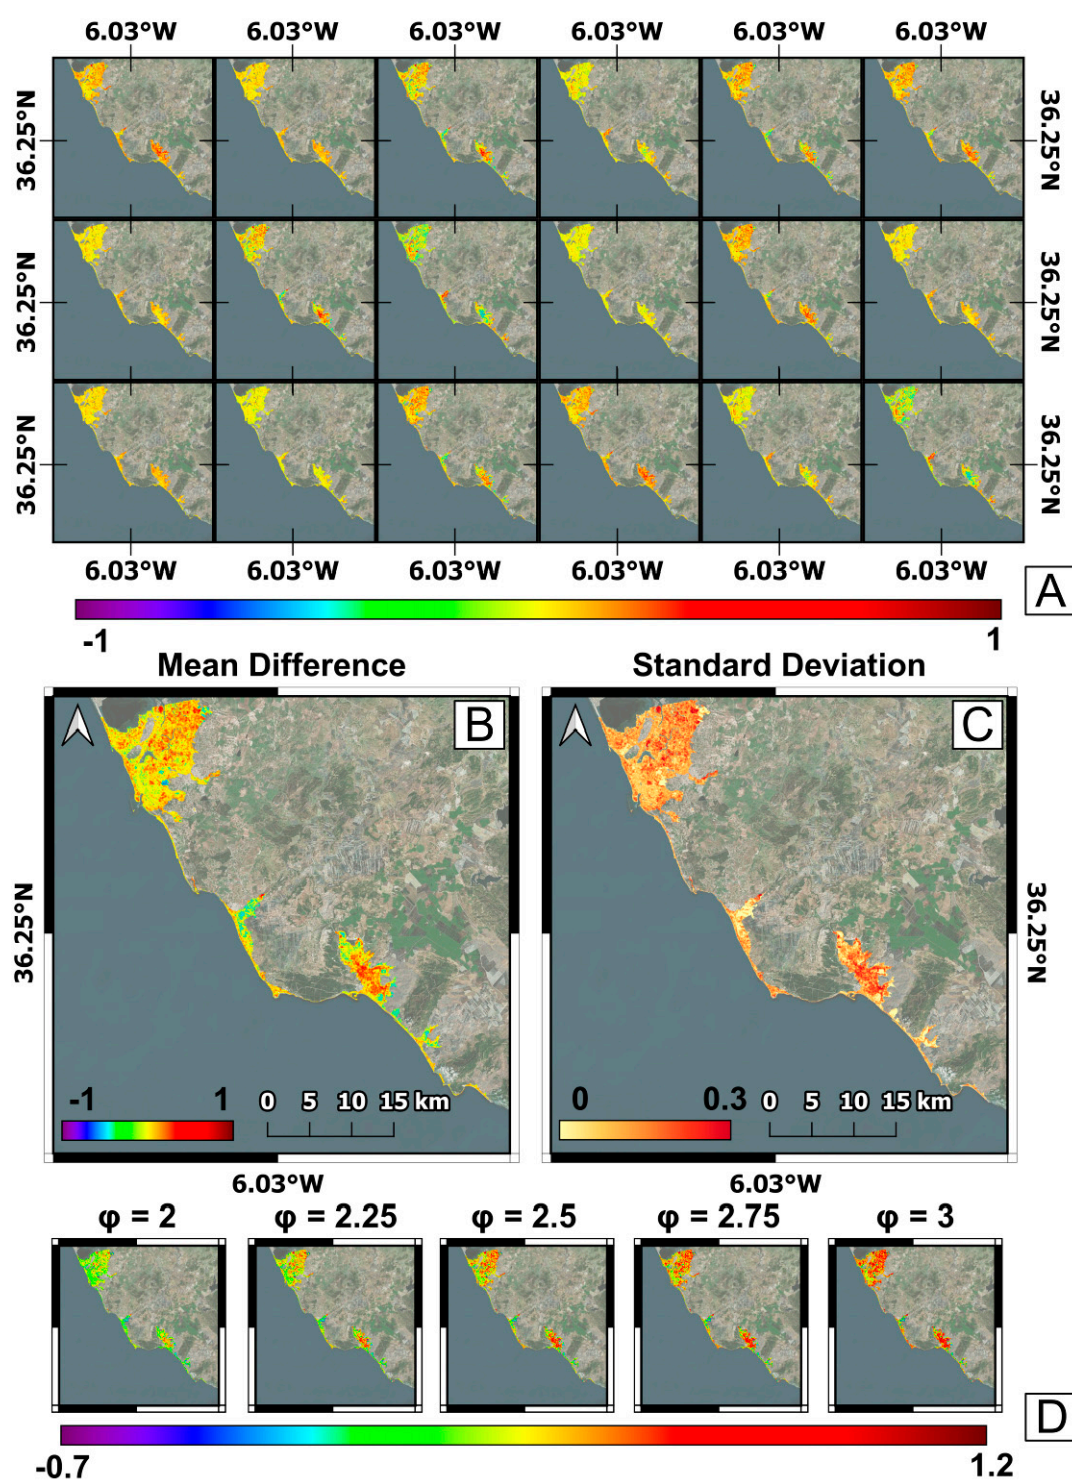

**Figure S1.** Coherence difference threshold workflow for < 8 m.a.s.l. pixels in ascending orbit images. 18 temporal series difference maps [A]; mean difference [B] and standard deviation [C] for the temporal series difference maps; and generated thresholds according to different  $\phi$  values [D].

24

25

26

27



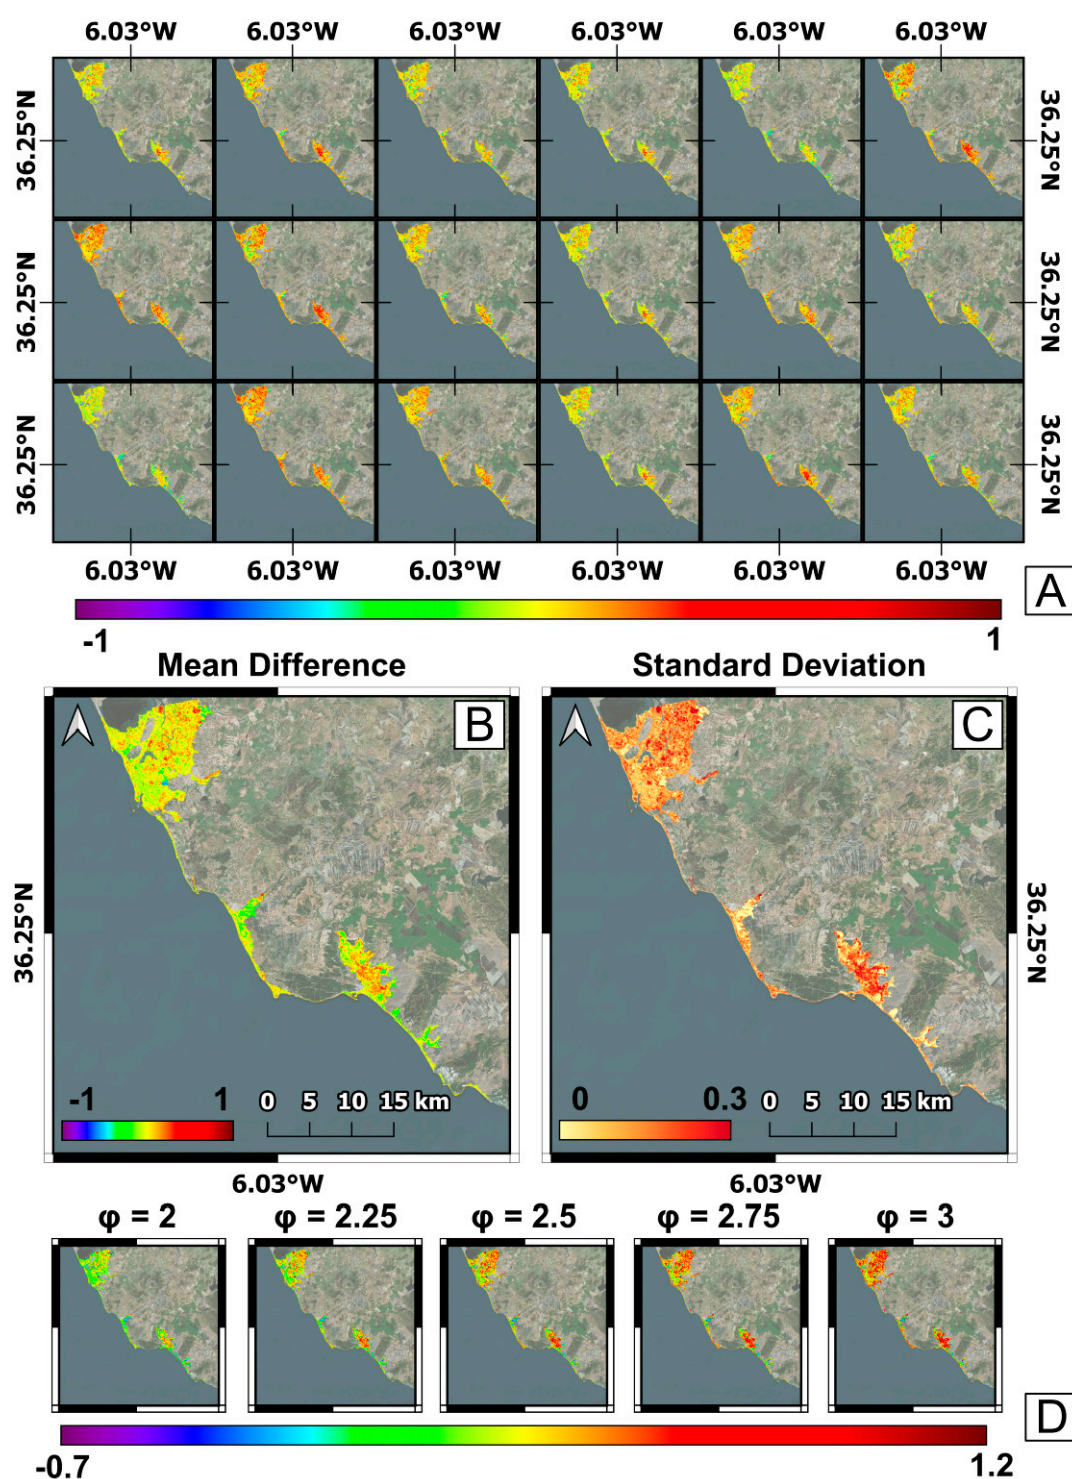

**Figure S2.** Coherence difference threshold workflow for < 8 m.a.s.l. pixels in descending orbit images. 18 temporal series difference maps [A]; mean difference [B] and standard deviation [C] for the temporal series difference maps; and generated thresholds according to different  $\phi$  values [D].
