# Supplementary material
Source: MDPI journal article supplement (https://www.mdpi.com/2072-4292/15/13/3233)
Supplement: s1 [file s1]

**Table S2.** Detail of the 40 S1 SAR interferometric pairs. Dates are in YYYY/MM/DD format. Blue diamond indicates the pre-storm image pairs and orange diamond indicates the storm image pairs. For those dates with both ascending and descending orbit images, the two perpendicular baselines are presented respectively.

| Image 1                                                                                        | Image 2                                                                                        | Btemp [d] | Orbit type | B <sub>L</sub> [m] |
|------------------------------------------------------------------------------------------------|------------------------------------------------------------------------------------------------|-----------|------------|--------------------|
| 2016/06/01                                                                                     | 2016/06/13                                                                                     | 12        | ASC        | 63.22              |
| 2016/07/19                                                                                     | 2016/07/31                                                                                     | 12        | ASC        | 36.17              |
| 2016/09/05                                                                                     | 2016/09/17                                                                                     | 12        | ASC        | 81.94              |
| 2016/07/01                                                                                     | 2016/07/13                                                                                     | 12        | DESC       | 67.22              |
| 2016/07/25                                                                                     | 2016/08/06                                                                                     | 12        | DESC       | 42.08              |
| 2016/09/11                                                                                     | 2016/09/23                                                                                     | 12        | DESC       | 50.67              |
| 2016/10/29                                                                                     | 2016/11/10                                                                                     | 12        | ASC / DESC | 100.12 / 120.77    |
| 2016/12/16                                                                                     | 2016/12/28                                                                                     | 12        | ASC / DESC | 53.04 / 39.64      |
| 2017/02/02                                                                                     | 2017/02/14                                                                                     | 12        | ASC / DESC | 21.39 / 37.91      |
| 2017/03/04                                                                                     | 2017/03/10                                                                                     | 6         | ASC / DESC | 20.46 / 35.43      |
| 2017/04/03                                                                                     | 2017/04/09                                                                                     | 6         | ASC / DESC | 9.07 / 117.73      |
| 2017/05/03                                                                                     | 2017/05/09                                                                                     | 6         | ASC / DESC | 66.74 / 10.44      |
| 2017/06/08                                                                                     | 2017/06/14                                                                                     | 6         | ASC / DESC | 29.23 / 98.31      |
| 2017/07/08                                                                                     | 2017/07/14                                                                                     | 6         | ASC / DESC | 85.81 / 66.68      |
| 2017/08/07                                                                                     | 2017/08/13                                                                                     | 6         | ASC / DESC | 74.19 / 72.90      |
| 2017/09/06                                                                                     | 2017/09/12                                                                                     | 6         | ASC / DESC | 182.49 / 21.64     |
| 2017/10/06                                                                                     | 2017/10/12                                                                                     | 6         | ASC / DESC | 143.92 / 41.81     |
| 2017/11/05                                                                                     | 2017/11/11                                                                                     | 6         | ASC / DESC | 58.77 / 86.09      |
| 2017/12/05                                                                                     | 2017/12/11                                                                                     | 6         | ASC / DESC | 134.45 / 103.29    |
| 2018/01/04                                                                                     | 2018/01/10                                                                                     | 6         | ASC / DESC | 51.32 / 17.95      |
| 2018/02/03                                                                                     | 2018/02/09                                                                                     | 6         | ASC / DESC | 13.02 / 60.81      |
| 2018/02/21  | 2018/02/27  | 6         | ASC / DESC | 35.84 / 134.49     |
| 2018/02/27  | 2018/03/05  | 6         | ASC / DESC | 37.47 / 32.95      |
